# Supplementary material for: Extracellular nucleotides as novel, underappreciated pro-metastatic factors that stimulate purinergic signaling in human lung cancer cells
Source: Springer Nature journal article supplement (doi:10.1186/s12943-015-0469-z), 2015-11-24

# Supplementary Figure 1

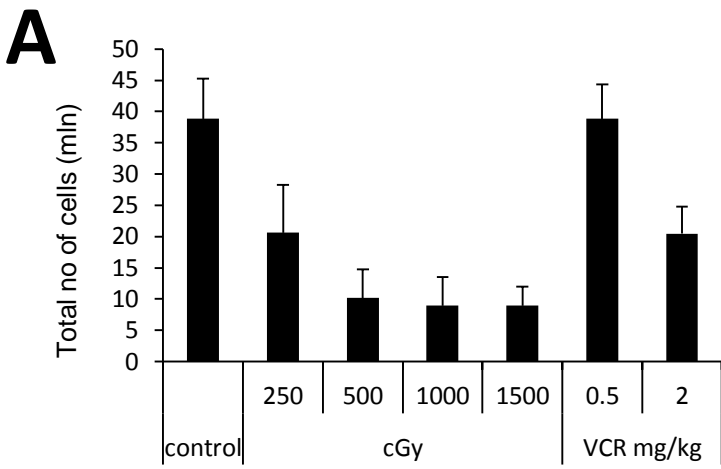

## Supplementary Figure 1.

**Panel A** Total number of cells isolated from tibia and femurs of animals 24 h after irradiation (0–1500 cGy) or vincristine administration (0.5–2 mg/kg). Combine results from three independent isolations.

**Panel B** The level of ATP, UTP and adenosine in murine plasma isolated from animals 24 h after irradiation (0–1500 cGy) or vincristine administration (0.5–2 mg/kg).

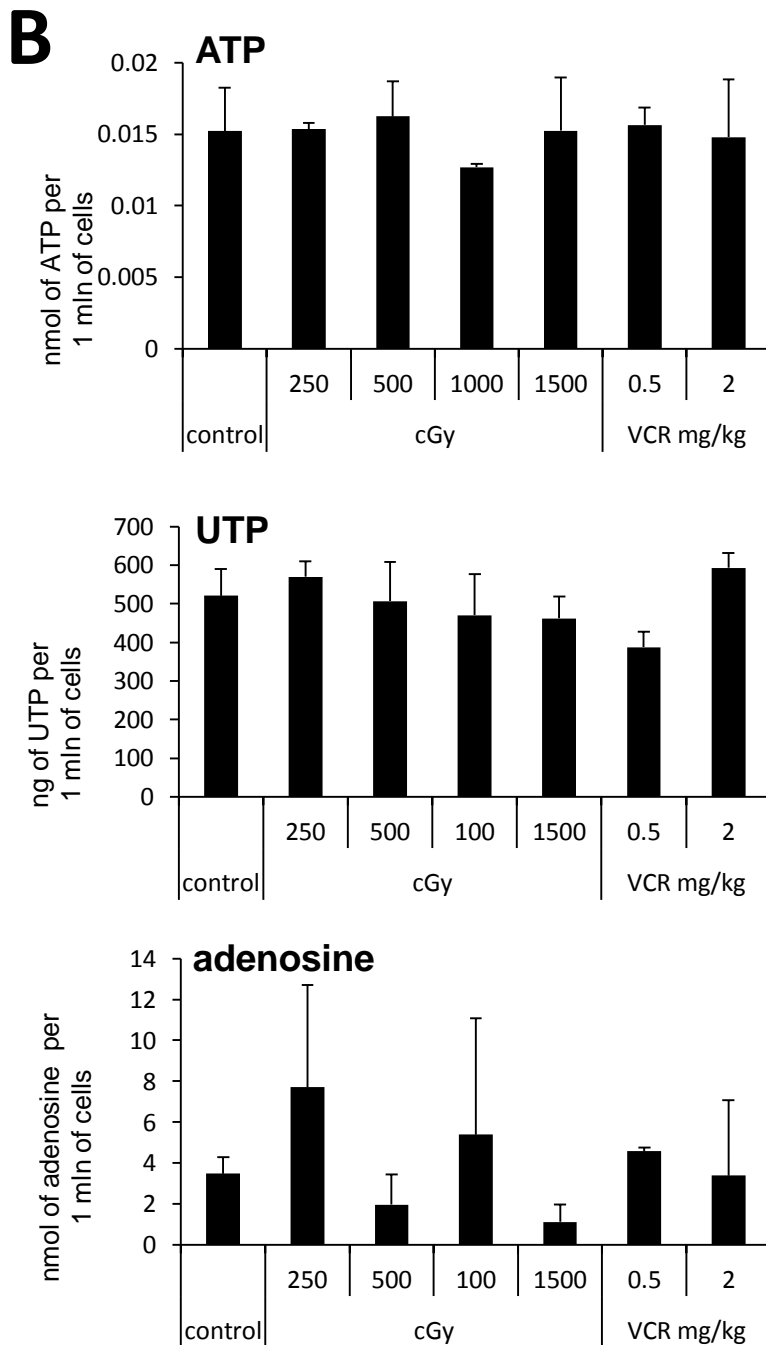

Supplement: MOESM2 [file 9763284]
