# Supplementary material for: Extracellular nucleotides as novel, underappreciated pro-metastatic factors that stimulate purinergic signaling in human lung cancer cells
Source: Springer Nature journal article supplement (doi:10.1186/s12943-015-0469-z), 2015-11-24
Supplement: MOESM4 [file 9763284]

# Supplementary Figure 3

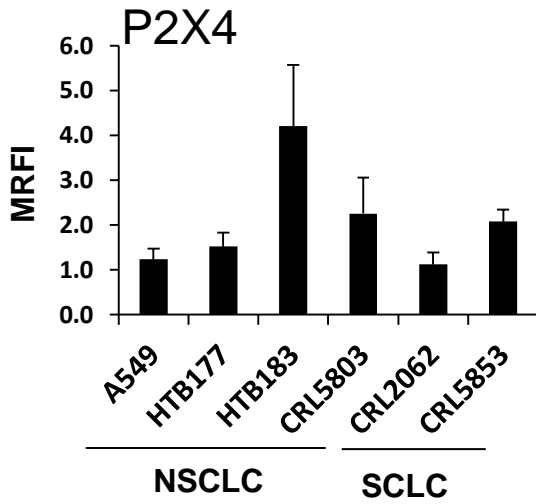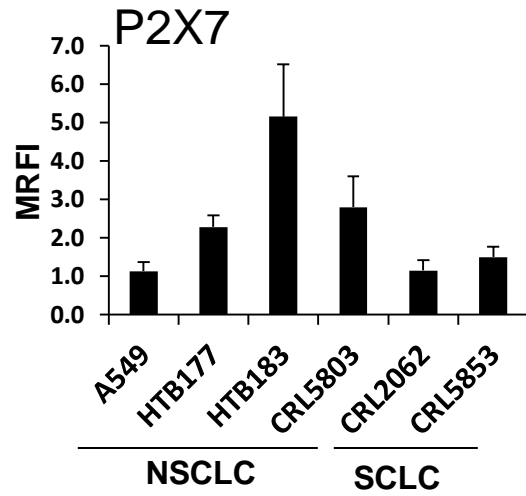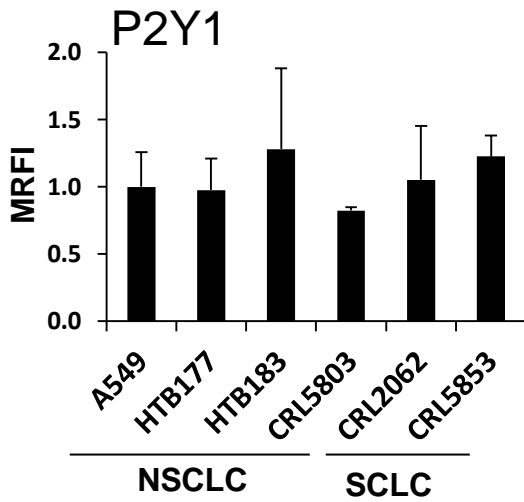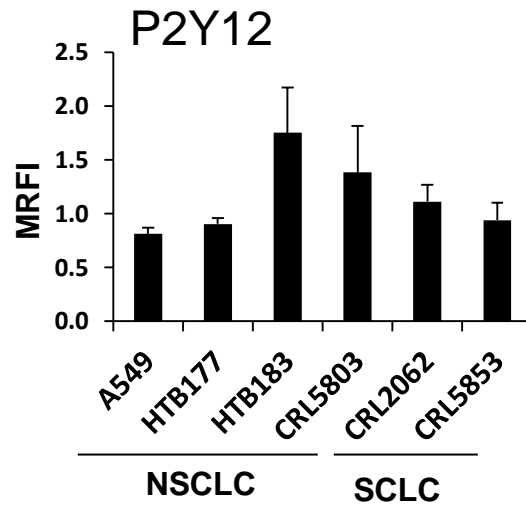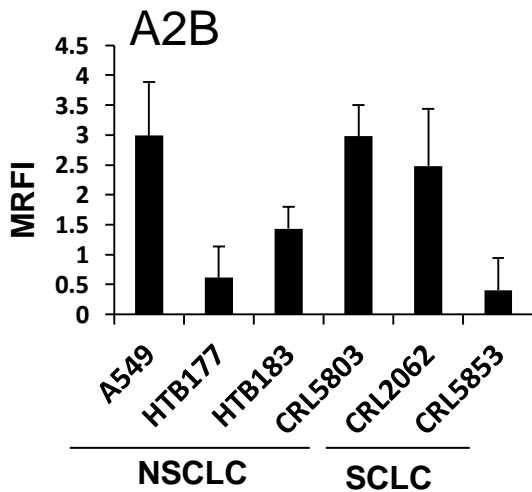

**Supplementary Figure 3. . Lung cancer cell lines express P1 and P2 receptors.** Analysis of mean relative of fluorescence intensity of A<sub>2B</sub>, P2X4, P2X7, P2Y1, P2Y12 receptors expression obtained by Flow Cytometry.
