# Supplementary material for: Extracellular nucleotides as novel, underappreciated pro-metastatic factors that stimulate purinergic signaling in human lung cancer cells
Source: Springer Nature journal article supplement (doi:10.1186/s12943-015-0469-z), 2015-11-24
Supplement: MOESM5 [file 9763284]

**A****HTB177**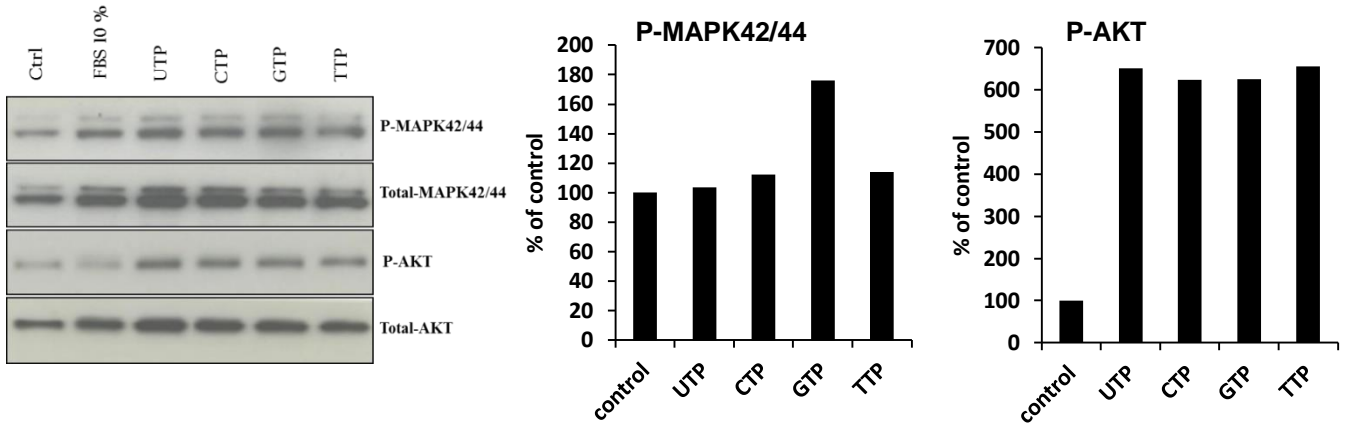**B****CRL5853**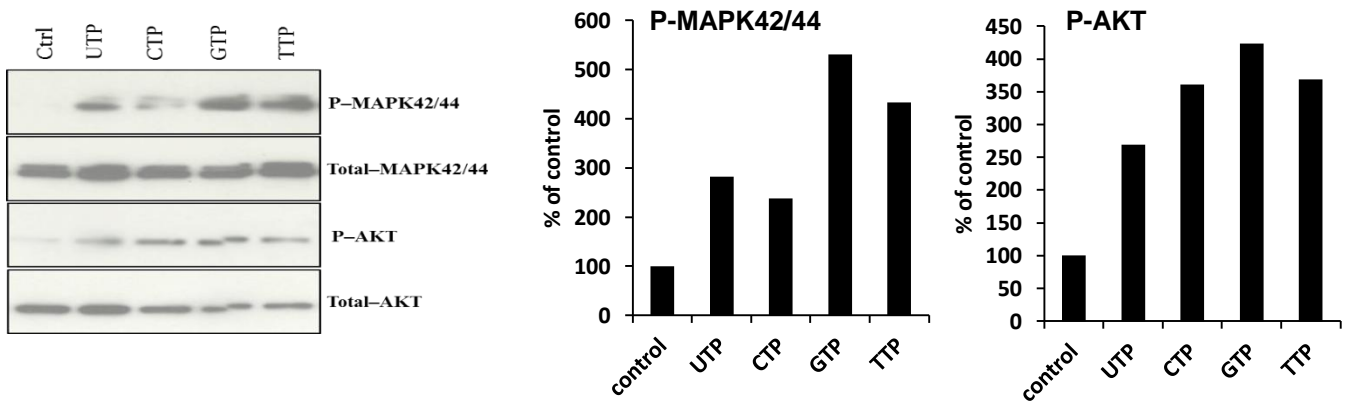

**Supplementary Figure 4. Extracellular TTP, UTP, CTP, and GTP stimulate human lung cancer cells.** Phosphorylation of p42/44 MAPK and AKT in the human NSCLC cell line HTB177 (**Panel A**) or the SCLC cell line CRL5853 (**Panel B**) stimulated for 5 min by the indicated nucleotides. The experiment was repeated twice, with similar results, and representative western blots are shown.
