# Supplementary material for: Extracellular nucleotides as novel, underappreciated pro-metastatic factors that stimulate purinergic signaling in human lung cancer cells
Source: Springer Nature journal article supplement (doi:10.1186/s12943-015-0469-z), 2015-11-24
Supplement: MOESM6 [file 9763284]

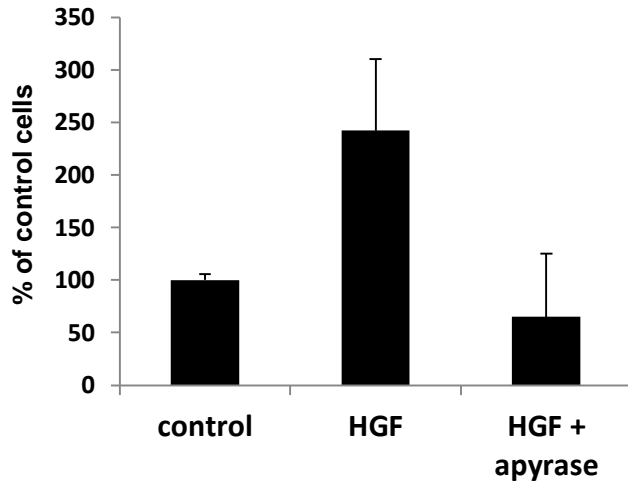

**Supplementary Figure 5. Autocrine release of ATP plays a role in migration of lung cancer cells to HGF.** Chemotaxis results of HTB177 cell line to HGF (10 ng/ml) in the absence or presence of apyrase (50U/ml).
